# Supplementary material for: Genetic determinants of blood gene expression and splicing and their contribution to molecular phenotypes and health outcomes
Source: bioRxiv or medRxiv preprint supplement (doi:10.1101/2023.11.25.23299014), 2023-11-27
Supplement: Supplementary file [file media-1.pdf]

## Supplementary Figures

- Figure S1. Correlation of *cis*-eQTL Z-scores between INTERVAL and eQTLGen.
- Figure S2. *Cis*-eQTL and -sQTL independent signal distribution around TSS and gene boundaries.
- Figure S3. *Cis*-eQTL and -sQTL colocalization analysis and lead SNP distribution around the TSS.
- Figure S4. Transcription factor annotation in *cis*- and *trans*-QTL results.
- Figure S5. Summary of splice event QC.
- Figure S6. Identification of the optimal number of PEER factors (latent variation estimated from gene expression data) to be included as covariates in the eQTL analysis.

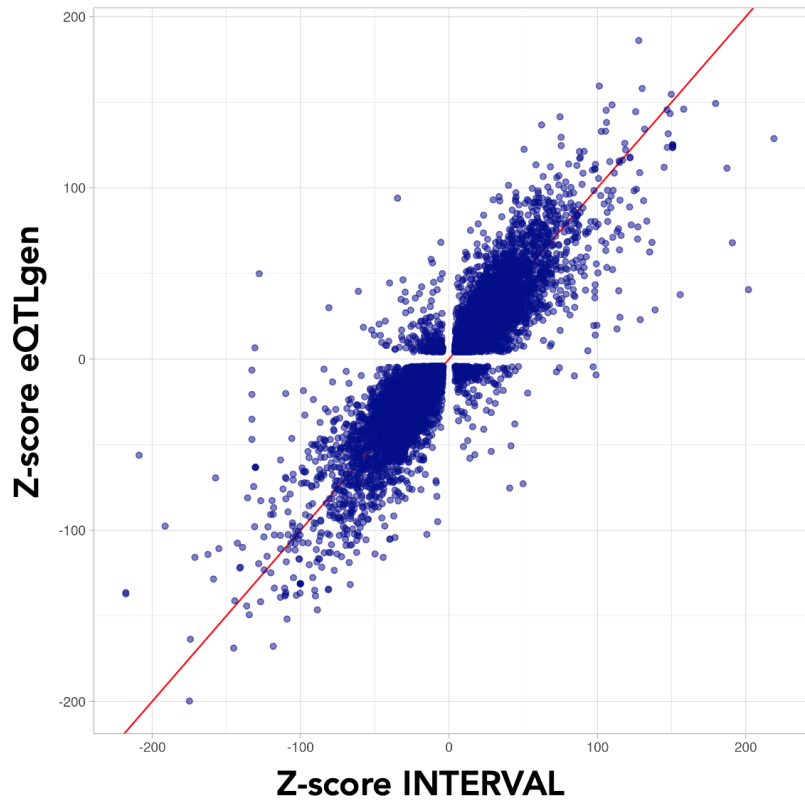

**Figure S1. Correlation of *cis*-eQTL Z-scores between INTERVAL and eQTLGen.**

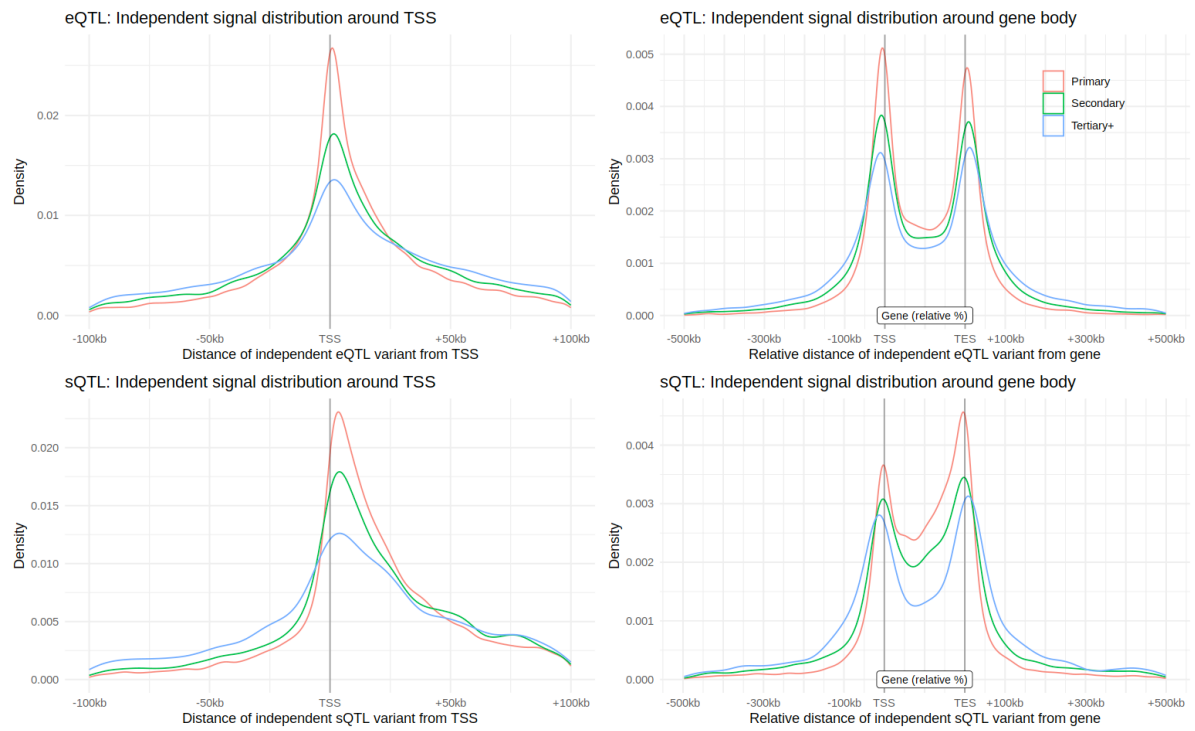

**Figure S2. *Cis*-eQTL and -sQTL independent signal distribution around TSS and gene boundaries.**

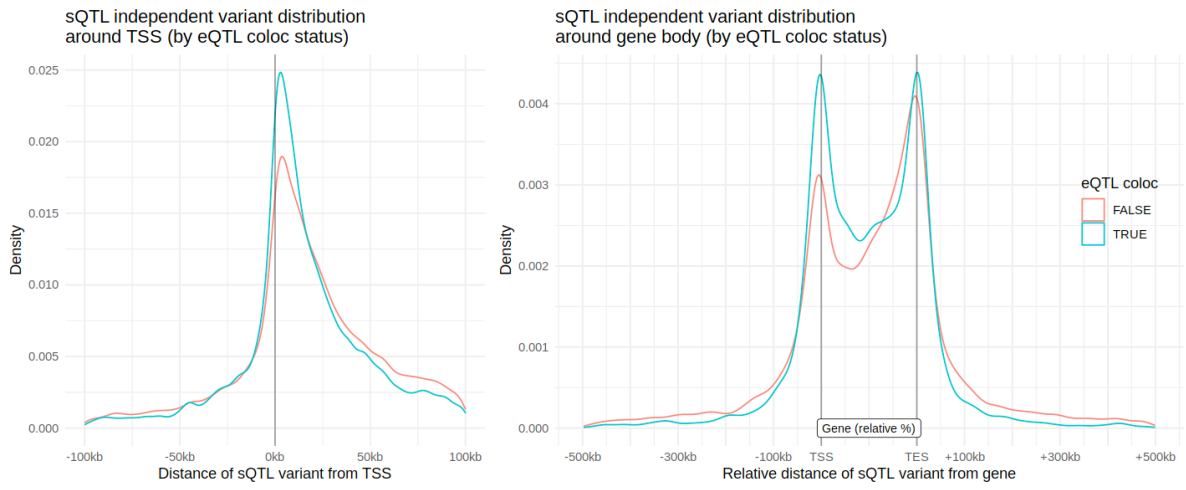

**Figure S3. *Cis*-eQTL and -sQTL colocalization analysis and lead SNP distribution around the TSS.**

**A**

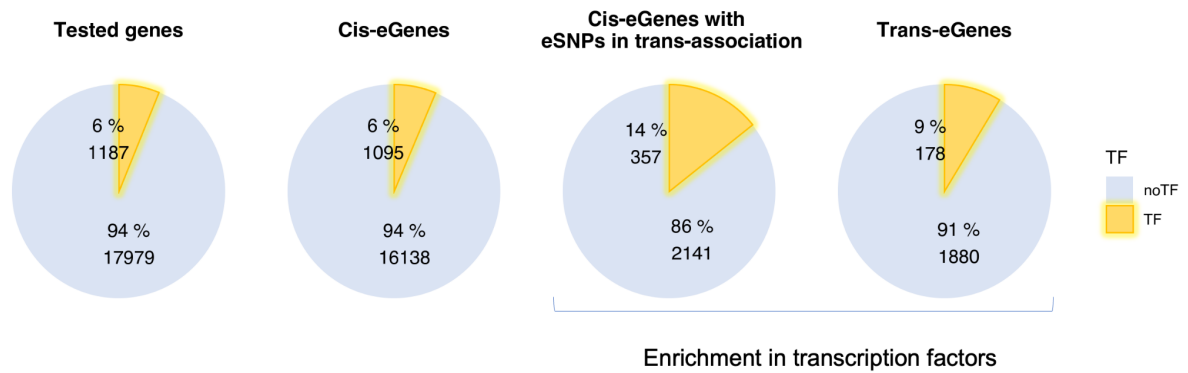

**B**

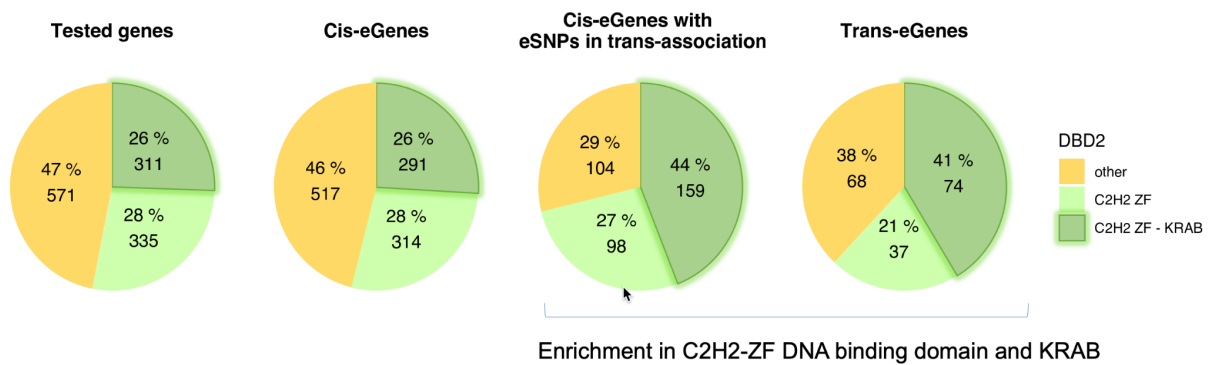

KRAB = Krüppel-associated box

**Figure S4. Transcription factor annotation in *cis*- and *trans*-QTL results.** A. Proportion of transcription factors in *cis*- and *trans*-eGenes; B. Subcategories of transcription factors in *cis*- and *trans*-eGenes.

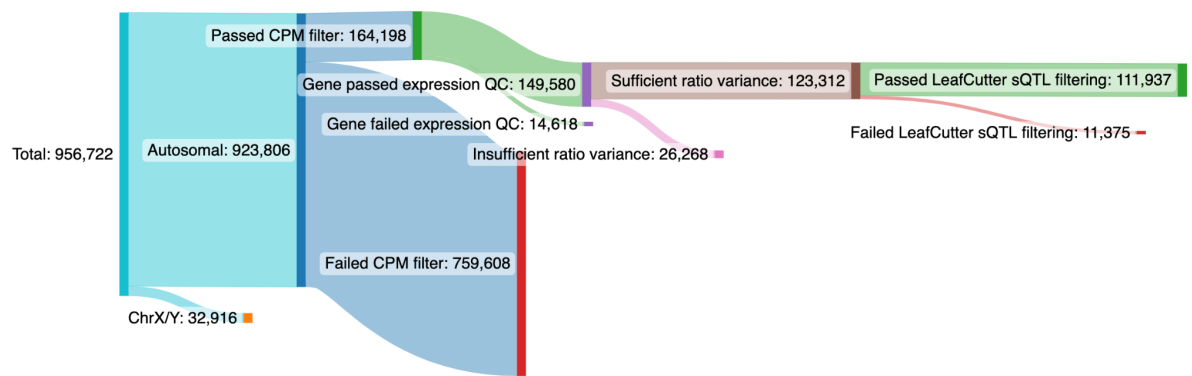

**Figure S5. Summary of splice event QC.**

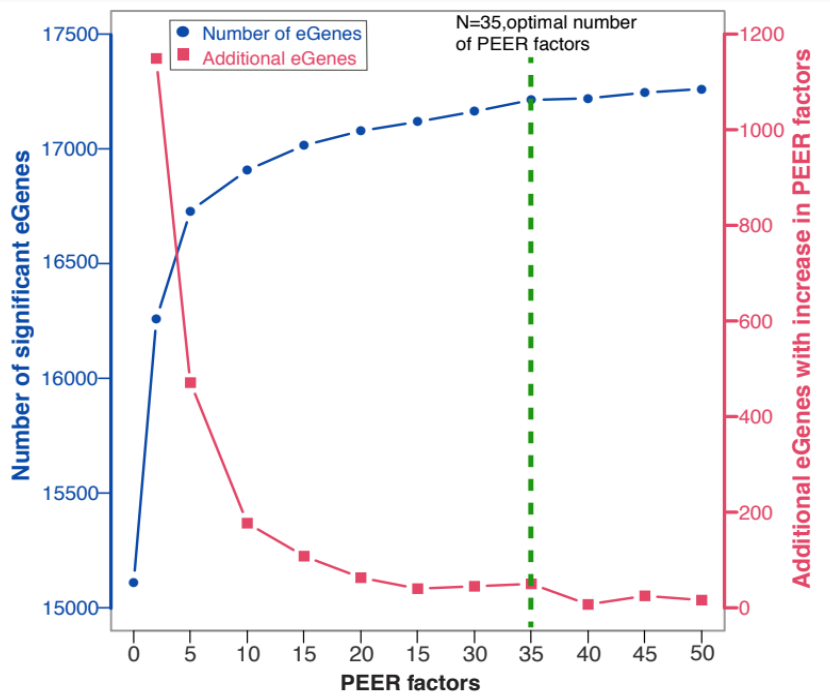

**Figure S6. Identification of the optimal number of PEER factors (latent variation estimated from gene expression data) to be included as covariates in the eQTL analysis.** PEER factors were chosen based on the maximum number of eGenes discovered (Y-axis, left) and the gain in eGenes with incremental increase in PEER factors (Y-axis, right).
